# Supplementary material for: Immunofluorescent Localization of Plakoglobin Is Altered in Endomyocardial Biopsy Samples from Dogs with Clinically Relevant Arrhythmogenic Right Ventricular Cardiomyopathy (ARVC)
Source: MDPI journal article supplement (doi:10.3390/vetsci8110248), 2021-10-23
Supplement: s1 [file s1]

# Supplemental

Table S1

| Case #     | Breed                  | Sex      | Age (Y)   | ECG         | Holter      | Echo        | Histo              | Confocal      | Striatin  | Group            |
|------------|------------------------|----------|-----------|-------------|-------------|-------------|--------------------|---------------|-----------|------------------|
| 1          | Cane Corso             | F        | 7         | VT          | NA          | WNL         | Fibro              | PG-ID         | NA        | non-ARVC         |
| 2          | Labrador               | M        | 3         | 3 AVB       | NA          | WNL         | Normal             | PG-ID         | NA        | non-ARVC         |
| 3          | Labrador               | M        | 6         | 3 AVB       | NA          | DCM         | Fibro/Lymphocytes  | PG-ID         | NA        | non-ARVC         |
| 4          | Labrador               | F        | 9         | 3 AVB       | NA          | WNL         | Normal             | ND            | NA        | non-ARVC         |
| 5          | Doberman               | F        | 7         | VT          | NA          | WNL         | Fibro              | PG-ID         | NA        | non-ARVC         |
| 6          | Labrador               | M        | 3         | AF          | NA          | DCM         | Fibro/Lymphocytes  | PG-ID         | NA        | non-ARVC         |
| 7          | Labrador               | M        | 4         | 3 AVB       | NA          | WNL         | Fibro              | PG-ID         | NA        | non-ARVC         |
| 8          | Bulldog                | M        | 1         | AF          | NA          | DCM         | Fibro              | PG-ID         | NA        | non-ARVC         |
| 9          | Mongrel                | M        | 1         | SR          | NA          | DCM         | Fibro/Lymphocytes  | PG-ID         | NA        | non-ARVC         |
| 10         | Boxer                  | M        | 3         | 3 AVB       | NA          | WNL         | Normal             | PG-ID         | NA        | non-ARVC         |
| <b>11</b>  | <b>Boxer</b>           | <b>M</b> | <b>1</b>  | <b>VT</b>   | <b>NA</b>   | <b>DCM</b>  | <b>Fibro / fat</b> | <b>PG-MIS</b> | <b>NA</b> | <b>clin-ARVC</b> |
| 12         | German Shepherd        | M        | 4         | AFIB+ 3 AVB | NA          | DCM         | Normal             | PG-ID         | NA        | non-ARVC         |
| 13         | Argentinian D.         | F        | 11        | VT          | NA          | PE          | Normal             | PG-ID         | NA        | non-ARVC         |
| 14         | Beagle                 | M        | 10        | VPCs        | NA          | DCM         | Fibro              | ND            | NA        | non-ARVC         |
| 15         | Dogue de Bordeaux      | F        | 6         | 3 AVB       | NA          | DCM         | Lymphocytes        | PG-ID         | NA        | non-ARVC         |
| 16         | Napolitain Mastiff     | FS       | 10        | SVT         | NA          | PE          | Fibro              | PG-ID         | NA        | non-ARVC         |
| 17         | Great Dane             | M        | 6         | 3 AVB       | NA          | DCM         | Normal             | PG-ID         | NA        | non-ARVC         |
| 18         | Mongrel                | F        | 5         | SR          | NA          | DCM         | Lymphocytes        | PG-ID         | NA        | non-ARVC         |
| 19         | Mongrel                | M        | 5         | SR          | NA          | DCM         | Fibro              | PG-ID         | NA        | non-ARVC         |
| 20         | Labrador               | M        | 5         | 3 AVB       | NA          | WNL         | Lymphocytes        | PG-ID         | NA        | non-ARVC         |
| <b>21</b>  | <b>Boxer</b>           | <b>F</b> | <b>2</b>  | <b>VT</b>   | <b>NA</b>   | <b>DCM</b>  | <b>Fibro / fat</b> | <b>PG-MIS</b> | <b>NA</b> | <b>clin-ARVC</b> |
| <b>22*</b> | <b>Mongrel</b>         | <b>M</b> | <b>11</b> | <b>VT</b>   | <b>NA</b>   | <b>CMVD</b> | <b>Lymphocytes</b> | <b>PG-MIS</b> | <b>NA</b> | <b>non-ARVC</b>  |
| 23         | Dogue de Bordeaux      | F        | 8         | AFL         | NA          | DCM         | Fibro/Lymphocytes  | PG-ID         | NA        | non-ARVC         |
| 24         | French Bulldog         | M        | 8         | SR          | NA          | DCM         | Fibro/Lymphocytes  | PG-ID         | NA        | non-ARVC         |
| 25         | Dogue de Bordeaux      | M        | 9         | CVP         | NA          | PE          | Fibro              | PG-ID         | NA        | non-ARVC         |
| 26         | Weimaraner             | M        | 7         | AF          | NA          | DCM         | Fibro              | PG-ID         | NA        | non-ARVC         |
| 27         | Mongrel                | M        | 6         | VPCs - TB   | NA          | DCM         | Fibro              | PG-ID         | NA        | non-ARVC         |
| 28         | Dogue de Bordeaux      | M        | 4         | AF          | NA          | DCM         | Lymphocytes        | PG-ID         | NA        | non-ARVC         |
| 29         | Labrador               | M        | 1         | AF          | NA          | DCM         | Fibro/Lymphocytes  | ND            | NA        | non-ARVC         |
| 30         | Dogue de Bordeaux      | M        | 2.6       | AF          | NA          | WNL         | Fibro              | PG-ID         | NA        | non-ARVC         |
| 31         | Boxer                  | FS       | 2         | FAT         | NA          | DCM         | Fibro              | PG-ID         | NA        | non-ARVC         |
| 32         | Broholmer              | M        | 2         | AF          | NA          | WNL         | Fibro              | PG-ID         | NA        | non-ARVC         |
| 33         | Golden Retriever       | M        | 0.5       | FAT         | NA          | DCM         | Fibro              | PG-ID         | NA        | non-ARVC         |
| 34         | Labrador               | M        | 4         | VPCs        | NA          | DCM         | Fibro              | PG-ID         | NA        | non-ARVC         |
| 35         | Mongrel                | M        | 10        | VT          | NA          | DCM         | Fibro              | PG-ID         | NA        | non-ARVC         |
| 36         | Bull Mastiff           | M        | 6         | AF          | NA          | DCM         | Fibro              | PG-ID         | NA        | non-ARVC         |
| 37         | Rhodesian Ridgeback    | M        | 4         | AF          | NA          | DCM         | Fibro              | ND            | NA        | non-ARVC         |
| 38         | German Shepherd        | M        | 8         | SR          | NA          | DCM         | Fibro/Lymphocytes  | PG-ID         | NA        | non-ARVC         |
| 39         | Doberman               | M        | 2.5       | FAT         | NA          | DCM         | Fibro              | PG-ID         | NA        | non-ARVC         |
| 40         | Golden Retriever       | FS       | 7         | AF          | NA          | DCM         | Fibro              | PG-ID         | NA        | non-ARVC         |
| 41         | Doberman               | M        | 2         | SR          | NA          | DCM         | Fibro/Lymphocytes  | PG-ID         | NA        | non-ARVC         |
| 42         | Labrador               | M        | 0.6       | SR          | NA          | DCM         | Fibro              | ND            | NA        | non-ARVC         |
| <b>43</b>  | <b>English Bulldog</b> | <b>M</b> | <b>9</b>  | <b>VT</b>   | <b>NA</b>   | <b>ARVC</b> | <b>Fibro / fat</b> | <b>PG-MIS</b> | <b>NA</b> | <b>clin-ARVC</b> |
| 44         | Boxer                  | M        | 9         | SR          | 765 VE      | WNL         | Fibro / fat        | PG-ID         | NEG       | occ-ARVC         |
| 45         | Boxer                  | F        | 6         | SR          | 11 VE       | WNL         | Fat                | PG-ID         | UNKN      | occ-ARVC         |
| 46         | Boxer                  | M        | 6         | SR          | 280 VE      | WNL         | Fibro / fat        | PG-ID         | NEG       | occ-ARVC         |
| 47         | Boxer                  | F        | 5         | SR          | 4 VE        | WNL         | Fat                | PG-ID         | NEG       | non-ARVC         |
| 48         | Boxer                  | F        | 7         | SR          | 3 VE, 9 SVE | WNL         | Fibro / fat        | PG-ID         | UNKN      | occ-ARVC         |
| 49         | Boxer                  | F        | 6         | SR          | 4400 VE     | WNL         | Fibro / fat        | PG-ID         | UNKN      | occ-ARVC         |

**Supplemental Table S1:** Patient information including breed, sex, age, ECG and Holter findings, echocardiographic findings (Echo), results of EMB histopathology (Histo), results of immunofluorescence microscopy (Confocal), striatin status, when available, and grouping. Shaded boxes denote dogs with a histopathologic diagnosis of ARVC. Bold text indicates dogs with mislocalized plakoglobin (**PG-MIS**). Dog #22 (asterisk) had PG-MIS, despite a diagnosis of non-ARVC cardiac disease. Abbreviations: AF (atrial fibrillation), ARVC (arrhythmogenic right ventricular cardiomyopathy), AVB (atrio-ventricular block), Clin-ARVC (ARVC with clinical signs), (CMVD (chronic mitral valve disease), DCM (dilated cardiomyopathy phenotype), FAT (focal atrial tachycardia), LP (lymphoplasmacytic), NEG (negative), ND (non-diagnostic), Non-ARVC (non-ARVC cardiac disease), Occ-ARVC (Occult ARVC, no clinical signs), PE (pericardial effusion), PC (cadherin), PG (plakoglobin), PG-ID (plakoglobin localized to intercalated disc), PG-MIS (plakoglobin mislocalized), SR (sinus rhythm), SVE (supraventricular ectopy), SVT (supraventricular tachycardia), VE (ventricular ectopy), VT (Ventricular tachycardia), WNL (within normal limits), UNKN (unknown).
